# Supplementary material for: Increasing life expectancy in China by achieving its 2025 air quality target
Source: PubMed Central journal article supplement — Environ Sci Ecotechnol. 2022 Aug 4;12:100203. doi: 10.1016/j.ese.2022.100203 (PMC9500367; doi:10.1016/j.ese.2022.100203), 2022-08-04
Supplement: mmc1.pdf [file mmc1.pdf]

## Supplementary Materials for

### Increasing life expectancy in China by achieving its 2025 air quality target

Yixuan Zheng<sup>1</sup>, Tao Xue<sup>2</sup>, Hongyan Zhao<sup>3</sup>, Yu Lei<sup>1\*</sup>

<sup>1</sup> *Center of Air Quality Simulation and System Analysis, Chinese Academy of Environmental Planning, Beijing, 100012, China*

<sup>2</sup> *Institute of Reproductive and Child Health / Ministry of Health Key Laboratory of Reproductive Health and Department of Epidemiology and Biostatistics, School of Public Health, Peking University, Beijing 100191, China*

<sup>3</sup> *Center for Atmospheric Environmental Studies, School of Environment, Beijing Normal University, Beijing, 100875, China*

Correspondence to: Yu Lei ([leiyu@caep.org.cn](mailto:leiyu@caep.org.cn))

## Supplementary Materials Figures:

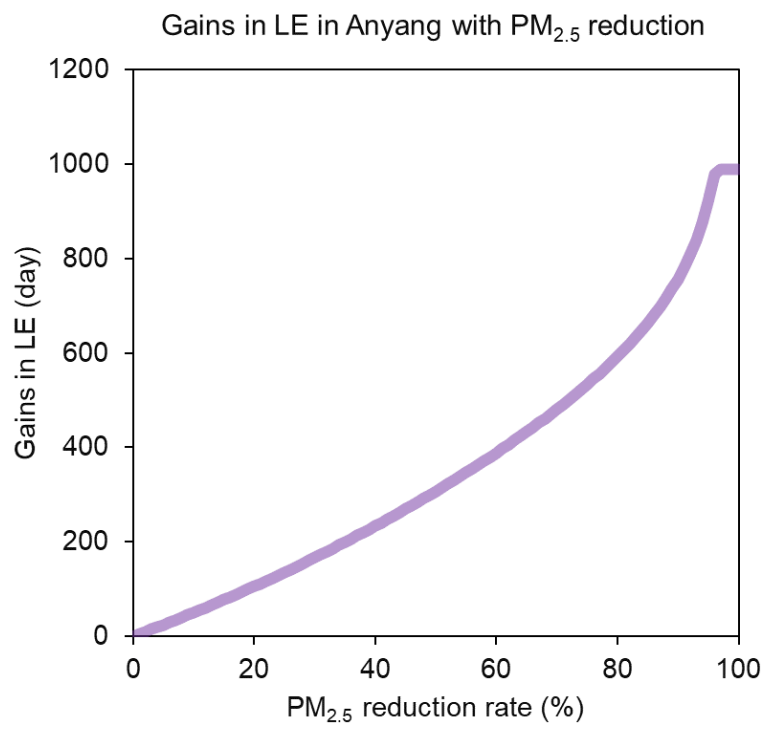

**Supplementary Materials Figure S1 | Potential to increase life expectancy by reducing PM<sub>2.5</sub> concentrations from 1% to 100%, with an interval of 1%, in Anyang, a city located in the BTHS region.**

## Supplementary Materials Tables:

Supplementary Materials Table S1 | City-level annual mean PM<sub>2.5</sub> concentration in 2020 and the three prospective scenarios (unit: µg/m<sup>3</sup>).

| City         | Region | PM <sub>2.5</sub> in 2020 (Base)* | PM <sub>2.5</sub> in Policy scenario | PM <sub>2.5</sub> in Average Reduction scenario | PM <sub>2.5</sub> in Outperform scenario |
|--------------|--------|-----------------------------------|--------------------------------------|-------------------------------------------------|------------------------------------------|
| Beijing      | BTHS   | 38                                | 32                                   | 34.2                                            | 29                                       |
| Tianjin      | BTHS   | 48                                | 38.4                                 | 43.2                                            | 33.5                                     |
| Shijiazhuang | BTHS   | 58                                | 46.4                                 | 52.2                                            | 40.5                                     |
| Tangshan     | BTHS   | 49                                | 39.2                                 | 44.1                                            | 34.2                                     |
| Qinhuangdao  | BTHS   | 34                                | 27.2                                 | 30.6                                            | 23.8                                     |
| Handan       | BTHS   | 57                                | 45.6                                 | 51.3                                            | 39.8                                     |
| Xingtai      | BTHS   | 53                                | 42.4                                 | 47.7                                            | 37                                       |
| Baoding      | BTHS   | 50                                | 40                                   | 45                                              | 34.9                                     |
| Zhangjiakou  | BTHS   | 23                                | 18.4                                 | 20.7                                            | 16.1                                     |
| Chengde      | BTHS   | 27                                | 21.6                                 | 24.3                                            | 18.9                                     |
| Cang         | BTHS   | 47                                | 37.6                                 | 42.3                                            | 32.8                                     |
| Langfang     | BTHS   | 42                                | 33.6                                 | 37.8                                            | 29.4                                     |
| Hengshui     | BTHS   | 52                                | 41.6                                 | 46.8                                            | 36.3                                     |
| Taiyuan      | FWP    | 54                                | 45.9                                 | 48.6                                            | 41.9                                     |
| Datong       | Other  | 31                                | 29.2                                 | 27.9                                            | 28.4                                     |
| Yangquan     | FWP    | 46                                | 39.1                                 | 41.4                                            | 35.7                                     |
| Zhangzhi     | FWP    | 44                                | 37.4                                 | 39.6                                            | 34.1                                     |
| Jincheng     | FWP    | 46                                | 39.1                                 | 41.4                                            | 35.7                                     |
| Shuozhou     | Other  | 37                                | 34.9                                 | 33.3                                            | 33.9                                     |
| Jinzhong     | FWP    | 42                                | 35.7                                 | 37.8                                            | 32.6                                     |
| Yuncheng     | FWP    | 57                                | 48.5                                 | 51.3                                            | 44.2                                     |
| Xinzhou      | Other  | 44                                | 41.5                                 | 39.6                                            | 40.3                                     |
| Linfen       | FWP    | 52                                | 44.2                                 | 46.8                                            | 40.3                                     |
| Lvliang      | FWP    | 33                                | 28.1                                 | 29.7                                            | 25.6                                     |
| Hohhot       | Other  | 40                                | 37.7                                 | 36                                              | 36.6                                     |
| Baotou       | Other  | 44                                | 41.5                                 | 39.6                                            | 40.3                                     |
| Wuhai        | Other  | 32                                | 30.2                                 | 28.8                                            | 29.3                                     |
| Chifeng      | Other  | 25                                | 23.6                                 | 22.5                                            | 22.9                                     |
| Tongliao     | Other  | 34                                | 32.1                                 | 30.6                                            | 31.1                                     |
| Ordos        | Other  | 24                                | 22.6                                 | 21.6                                            | 22                                       |
| Hulunbuir    | Other  | 18                                | 17                                   | 16.2                                            | 16.5                                     |
| Bayannur     | Other  | 33                                | 31.1                                 | 29.7                                            | 30.2                                     |
| Ulanqab      | Other  | 22                                | 20.8                                 | 19.8                                            | 20.1                                     |
| Hinggan      | Other  | 25                                | 23.6                                 | 22.5                                            | 22.9                                     |
| Xilingol     | Other  | 9                                 | 8.5                                  | 8.1                                             | 8.2                                      |

| <b>City</b>     | <b>Region</b> | <b>PM<sub>2.5</sub> in 2020 (Base)*</b> | <b>PM<sub>2.5</sub> in Policy scenario</b> | <b>PM<sub>2.5</sub> in Average Reduction scenario</b> | <b>PM<sub>2.5</sub> in Outperform scenario</b> |
|-----------------|---------------|-----------------------------------------|--------------------------------------------|-------------------------------------------------------|------------------------------------------------|
| Alxa            | Other         | 23                                      | 21.7                                       | 20.7                                                  | 21.1                                           |
| Shenyang        | Other         | 42                                      | 39.6                                       | 37.8                                                  | 38.4                                           |
| Dalian          | Other         | 30                                      | 28.3                                       | 27                                                    | 27.5                                           |
| Anshan          | Other         | 44                                      | 41.5                                       | 39.6                                                  | 40.3                                           |
| Fushun          | Other         | 43                                      | 40.6                                       | 38.7                                                  | 39.4                                           |
| Benxi           | Other         | 35                                      | 33                                         | 31.5                                                  | 32                                             |
| Dandong         | Other         | 29                                      | 27.4                                       | 26.1                                                  | 26.5                                           |
| Jinzhou         | Other         | 47                                      | 44.3                                       | 42.3                                                  | 43                                             |
| Yingkou         | Other         | 41                                      | 38.7                                       | 36.9                                                  | 37.5                                           |
| Fuxin           | Other         | 36                                      | 34                                         | 32.4                                                  | 33                                             |
| Liaoyang        | Other         | 41                                      | 38.7                                       | 36.9                                                  | 37.5                                           |
| Panjin          | Other         | 35                                      | 33                                         | 31.5                                                  | 32                                             |
| Tieling         | Other         | 39                                      | 36.8                                       | 35.1                                                  | 35.7                                           |
| Chaoyang        | Other         | 35                                      | 33                                         | 31.5                                                  | 32                                             |
| Huludao         | Other         | 42                                      | 39.6                                       | 37.8                                                  | 38.4                                           |
| Changchun       | Other         | 42                                      | 39.6                                       | 37.8                                                  | 38.4                                           |
| Jilin           | Other         | 41                                      | 38.7                                       | 36.9                                                  | 37.5                                           |
| Siping          | Other         | 33                                      | 31.1                                       | 29.7                                                  | 30.2                                           |
| Liaoyuan        | Other         | 39                                      | 36.8                                       | 35.1                                                  | 35.7                                           |
| Tonghua         | Other         | 27                                      | 25.5                                       | 24.3                                                  | 24.7                                           |
| Baishan         | Other         | 28                                      | 26.4                                       | 25.2                                                  | 25.6                                           |
| Songyuan        | Other         | 27                                      | 25.5                                       | 24.3                                                  | 24.7                                           |
| Baicheng        | Other         | 25                                      | 23.6                                       | 22.5                                                  | 22.9                                           |
| Yanbian         | Other         | 21                                      | 19.8                                       | 18.9                                                  | 19.2                                           |
| Harbin          | Other         | 47                                      | 44.3                                       | 42.3                                                  | 43                                             |
| Qiqihar         | Other         | 31                                      | 29.2                                       | 27.9                                                  | 28.4                                           |
| Jixi            | Other         | 28                                      | 26.4                                       | 25.2                                                  | 25.6                                           |
| Hegang          | Other         | 24                                      | 22.6                                       | 21.6                                                  | 22                                             |
| Shuangyashan    | Other         | 26                                      | 24.5                                       | 23.4                                                  | 23.8                                           |
| Daqing          | Other         | 28                                      | 26.4                                       | 25.2                                                  | 25.6                                           |
| Yichun          | Other         | 21                                      | 19.8                                       | 18.9                                                  | 19.2                                           |
| Jiamusi         | Other         | 28                                      | 26.4                                       | 25.2                                                  | 25.6                                           |
| Qitaihe         | Other         | 33                                      | 31.1                                       | 29.7                                                  | 30.2                                           |
| Mudanjiang      | Other         | 31                                      | 29.2                                       | 27.9                                                  | 28.4                                           |
| Heihe           | Other         | 17                                      | 16                                         | 15.3                                                  | 15.6                                           |
| Suihua          | Other         | 41                                      | 38.7                                       | 36.9                                                  | 37.5                                           |
| Da Hinggan Ling | Other         | 14                                      | 13.2                                       | 12.6                                                  | 12.8                                           |
| Shanghai        | YRD           | 32                                      | 27.2                                       | 28.8                                                  | 24.8                                           |

| <b>City</b> | <b>Region</b> | <b>PM<sub>2.5</sub> in 2020 (Base)*</b> | <b>PM<sub>2.5</sub> in Policy scenario</b> | <b>PM<sub>2.5</sub> in Average Reduction scenario</b> | <b>PM<sub>2.5</sub> in Outperform scenario</b> |
|-------------|---------------|-----------------------------------------|--------------------------------------------|-------------------------------------------------------|------------------------------------------------|
| Nanjing     | YRD           | 31                                      | 26.4                                       | 27.9                                                  | 24                                             |
| Wuxi        | YRD           | 33                                      | 28.1                                       | 29.7                                                  | 25.6                                           |
| Xuzhou      | YRD           | 50                                      | 42.5                                       | 45                                                    | 38.8                                           |
| Changzhou   | YRD           | 40                                      | 34                                         | 36                                                    | 31                                             |
| Suzhou      | YRD           | 33                                      | 28.1                                       | 29.7                                                  | 25.6                                           |
| Nantong     | YRD           | 34                                      | 28.9                                       | 30.6                                                  | 26.4                                           |
| Lianyungang | YRD           | 37                                      | 31.5                                       | 33.3                                                  | 28.7                                           |
| Huaian      | YRD           | 42                                      | 35.7                                       | 37.8                                                  | 32.6                                           |
| Yancheng    | YRD           | 33                                      | 28.1                                       | 29.7                                                  | 25.6                                           |
| Yangzhou    | YRD           | 36                                      | 30.6                                       | 32.4                                                  | 27.9                                           |
| Zhenjiang   | YRD           | 38                                      | 32.3                                       | 34.2                                                  | 29.5                                           |
| Taizhou     | YRD           | 37                                      | 31.5                                       | 33.3                                                  | 28.7                                           |
| Suqian      | YRD           | 45                                      | 38.3                                       | 40.5                                                  | 34.9                                           |
| Hangzhou    | Other         | 30                                      | 28.3                                       | 27                                                    | 27.5                                           |
| Ningbo      | Other         | 23                                      | 21.7                                       | 20.7                                                  | 21.1                                           |
| Wenzhou     | Other         | 25                                      | 23.6                                       | 22.5                                                  | 22.9                                           |
| Jiaxing     | Other         | 28                                      | 26.4                                       | 25.2                                                  | 25.6                                           |
| Huzhou      | Other         | 26                                      | 24.5                                       | 23.4                                                  | 23.8                                           |
| Shaoxing    | Other         | 28                                      | 26.4                                       | 25.2                                                  | 25.6                                           |
| Jinhua      | Other         | 28                                      | 26.4                                       | 25.2                                                  | 25.6                                           |
| Quzhou      | Other         | 26                                      | 24.5                                       | 23.4                                                  | 23.8                                           |
| Zhoushan    | Other         | 17                                      | 16                                         | 15.3                                                  | 15.6                                           |
| Taizhou     | Other         | 25                                      | 23.6                                       | 22.5                                                  | 22.9                                           |
| Lishui      | Other         | 21                                      | 19.8                                       | 18.9                                                  | 19.2                                           |
| Hefei       | YRD           | 36                                      | 30.6                                       | 32.4                                                  | 27.9                                           |
| Wuhu        | YRD           | 35                                      | 29.8                                       | 31.5                                                  | 27.1                                           |
| Bengbu      | YRD           | 43                                      | 36.6                                       | 38.7                                                  | 33.3                                           |
| Huainan     | YRD           | 48                                      | 40.8                                       | 43.2                                                  | 37.2                                           |
| Maanshan    | YRD           | 36                                      | 30.6                                       | 32.4                                                  | 27.9                                           |
| Huaibei     | YRD           | 48                                      | 40.8                                       | 43.2                                                  | 37.2                                           |
| Tongling    | YRD           | 35                                      | 29.8                                       | 31.5                                                  | 27.1                                           |
| Anqing      | YRD           | 36                                      | 30.6                                       | 32.4                                                  | 27.9                                           |
| Huangshan   | YRD           | 20                                      | 17                                         | 18                                                    | 15.5                                           |
| Chuzhou     | YRD           | 39                                      | 33.2                                       | 35.1                                                  | 30.2                                           |
| Fuyang      | YRD           | 49                                      | 41.7                                       | 44.1                                                  | 38                                             |
| Suzhou      | YRD           | 46                                      | 39.1                                       | 41.4                                                  | 35.7                                           |
| Luan        | YRD           | 37                                      | 31.5                                       | 33.3                                                  | 28.7                                           |
| Bozhou      | YRD           | 47                                      | 40                                         | 42.3                                                  | 36.4                                           |

| <b>City</b> | <b>Region</b> | <b>PM<sub>2.5</sub> in 2020 (Base)*</b> | <b>PM<sub>2.5</sub> in Policy scenario</b> | <b>PM<sub>2.5</sub> in Average Reduction scenario</b> | <b>PM<sub>2.5</sub> in Outperform scenario</b> |
|-------------|---------------|-----------------------------------------|--------------------------------------------|-------------------------------------------------------|------------------------------------------------|
| Chizhou     | YRD           | 34                                      | 28.9                                       | 30.6                                                  | 26.4                                           |
| Xuancheng   | YRD           | 33                                      | 28.1                                       | 29.7                                                  | 25.6                                           |
| Fuzhou      | Other         | 21                                      | 19.8                                       | 18.9                                                  | 19.2                                           |
| Xiamen      | Other         | 18                                      | 17                                         | 16.2                                                  | 16.5                                           |
| Putian      | Other         | 22                                      | 20.8                                       | 19.8                                                  | 20.1                                           |
| Sanming     | Other         | 22                                      | 20.8                                       | 19.8                                                  | 20.1                                           |
| Quanzhou    | Other         | 21                                      | 19.8                                       | 18.9                                                  | 19.2                                           |
| Zhangzhou   | Other         | 20                                      | 18.9                                       | 18                                                    | 18.3                                           |
| Nanping     | Other         | 19                                      | 17.9                                       | 17.1                                                  | 17.4                                           |
| Longyan     | Other         | 18                                      | 17                                         | 16.2                                                  | 16.5                                           |
| Ningde      | Other         | 22                                      | 20.8                                       | 19.8                                                  | 20.1                                           |
| Nanchang    | Other         | 33                                      | 31.1                                       | 29.7                                                  | 30.2                                           |
| Jingdezhen  | Other         | 25                                      | 23.6                                       | 22.5                                                  | 22.9                                           |
| Pingxiang   | Other         | 33                                      | 31.1                                       | 29.7                                                  | 30.2                                           |
| Jiujiang    | Other         | 38                                      | 35.9                                       | 34.2                                                  | 34.8                                           |
| Xinyu       | Other         | 30                                      | 28.3                                       | 27                                                    | 27.5                                           |
| Yingtian    | Other         | 32                                      | 30.2                                       | 28.8                                                  | 29.3                                           |
| Ganzhou     | Other         | 26                                      | 24.5                                       | 23.4                                                  | 23.8                                           |
| Jian        | Other         | 28                                      | 26.4                                       | 25.2                                                  | 25.6                                           |
| Yichun      | Other         | 31                                      | 29.2                                       | 27.9                                                  | 28.4                                           |
| Fuzhou      | Other         | 27                                      | 25.5                                       | 24.3                                                  | 24.7                                           |
| Shangrao    | Other         | 29                                      | 27.4                                       | 26.1                                                  | 26.5                                           |
| Jinan       | BTHS          | 50                                      | 40                                         | 45                                                    | 34.9                                           |
| Qingdao     | BTHS          | 32                                      | 25.6                                       | 28.8                                                  | 22.4                                           |
| Zibo        | BTHS          | 54                                      | 43.2                                       | 48.6                                                  | 37.7                                           |
| Zaozhuang   | BTHS          | 55                                      | 44                                         | 49.5                                                  | 38.4                                           |
| Dongying    | BTHS          | 46                                      | 36.8                                       | 41.4                                                  | 32.1                                           |
| Yantai      | Other         | 32                                      | 30.2                                       | 28.8                                                  | 29.3                                           |
| Weifang     | BTHS          | 50                                      | 40                                         | 45                                                    | 34.9                                           |
| Jining      | BTHS          | 53                                      | 42.4                                       | 47.7                                                  | 37                                             |
| Taian       | BTHS          | 50                                      | 40                                         | 45                                                    | 34.9                                           |
| Weihai      | Other         | 26                                      | 24.5                                       | 23.4                                                  | 23.8                                           |
| Rizhao      | BTHS          | 37                                      | 29.6                                       | 33.3                                                  | 25.9                                           |
| Linyi       | BTHS          | 48                                      | 38.4                                       | 43.2                                                  | 33.5                                           |
| Dezhou      | BTHS          | 49                                      | 39.2                                       | 44.1                                                  | 34.2                                           |
| Liaocheng   | BTHS          | 53                                      | 42.4                                       | 47.7                                                  | 37                                             |
| Binzhou     | BTHS          | 49                                      | 39.2                                       | 44.1                                                  | 34.2                                           |
| Heze        | BTHS          | 53                                      | 42.4                                       | 47.7                                                  | 37                                             |

| <b>City</b>  | <b>Region</b> | <b>PM<sub>2.5</sub> in 2020 (Base)*</b> | <b>PM<sub>2.5</sub> in Policy scenario</b> | <b>PM<sub>2.5</sub> in Average Reduction scenario</b> | <b>PM<sub>2.5</sub> in Outperform scenario</b> |
|--------------|---------------|-----------------------------------------|--------------------------------------------|-------------------------------------------------------|------------------------------------------------|
| Zhengzhou    | BTHS          | 51                                      | 40.8                                       | 45.9                                                  | 35.6                                           |
| Kaifeng      | BTHS          | 55                                      | 44                                         | 49.5                                                  | 38.4                                           |
| Luoyang      | BTHS          | 51                                      | 40.8                                       | 45.9                                                  | 35.6                                           |
| Pingdingshan | BTHS          | 51                                      | 40.8                                       | 45.9                                                  | 35.6                                           |
| Anyang       | BTHS          | 62                                      | 49.6                                       | 55.8                                                  | 43.3                                           |
| Hebi         | BTHS          | 57                                      | 45.6                                       | 51.3                                                  | 39.8                                           |
| Xinxiang     | BTHS          | 52                                      | 41.6                                       | 46.8                                                  | 36.3                                           |
| Jiaozuo      | BTHS          | 56                                      | 44.8                                       | 50.4                                                  | 39.1                                           |
| Puyang       | BTHS          | 59                                      | 47.2                                       | 53.1                                                  | 41.2                                           |
| Xuchang      | BTHS          | 53                                      | 42.4                                       | 47.7                                                  | 37                                             |
| Tahe         | BTHS          | 55                                      | 44                                         | 49.5                                                  | 38.4                                           |
| Sanmenxia    | BTHS          | 48                                      | 38.4                                       | 43.2                                                  | 33.5                                           |
| Nanyang      | BTHS          | 51                                      | 40.8                                       | 45.9                                                  | 35.6                                           |
| Shangqiu     | BTHS          | 52                                      | 41.6                                       | 46.8                                                  | 36.3                                           |
| Xinyang      | BTHS          | 40                                      | 32                                         | 36                                                    | 28                                             |
| Zhoukou      | BTHS          | 50                                      | 40                                         | 45                                                    | 34.9                                           |
| Zhumadian    | BTHS          | 45                                      | 36                                         | 40.5                                                  | 31.5                                           |
| Wuhan        | Other         | 37                                      | 34.9                                       | 33.3                                                  | 33.9                                           |
| Huangshi     | Other         | 35                                      | 33                                         | 31.5                                                  | 32                                             |
| Shiyan       | Other         | 33                                      | 31.1                                       | 29.7                                                  | 30.2                                           |
| Yichang      | Other         | 41                                      | 38.7                                       | 36.9                                                  | 37.5                                           |
| Xiangyang    | Other         | 52                                      | 49.1                                       | 46.8                                                  | 47.6                                           |
| Ezhou        | Other         | 38                                      | 35.9                                       | 34.2                                                  | 34.8                                           |
| Jingmen      | Other         | 45                                      | 42.5                                       | 40.5                                                  | 41.2                                           |
| Xiaogan      | Other         | 35                                      | 33                                         | 31.5                                                  | 32                                             |
| Jingzhou     | Other         | 37                                      | 34.9                                       | 33.3                                                  | 33.9                                           |
| Huanggang    | Other         | 36                                      | 34                                         | 32.4                                                  | 33                                             |
| Xianning     | Other         | 30                                      | 28.3                                       | 27                                                    | 27.5                                           |
| Suizhou      | Other         | 37                                      | 34.9                                       | 33.3                                                  | 33.9                                           |
| Enshi        | Other         | 27                                      | 25.5                                       | 24.3                                                  | 24.7                                           |
| Changsha     | Other         | 41                                      | 38.7                                       | 36.9                                                  | 37.5                                           |
| Zhuzhou      | Other         | 38                                      | 35.9                                       | 34.2                                                  | 34.8                                           |
| Xiangtan     | Other         | 39                                      | 36.8                                       | 35.1                                                  | 35.7                                           |
| Hengyang     | Other         | 35                                      | 33                                         | 31.5                                                  | 32                                             |
| Shaoyang     | Other         | 38                                      | 35.9                                       | 34.2                                                  | 34.8                                           |
| Yueyang      | Other         | 37                                      | 34.9                                       | 33.3                                                  | 33.9                                           |
| Changde      | Other         | 41                                      | 38.7                                       | 36.9                                                  | 37.5                                           |
| Zhangjiajie  | Other         | 25                                      | 23.6                                       | 22.5                                                  | 22.9                                           |

| <b>City</b>   | <b>Region</b> | <b>PM<sub>2.5</sub> in 2020 (Base)*</b> | <b>PM<sub>2.5</sub> in Policy scenario</b> | <b>PM<sub>2.5</sub> in Average Reduction scenario</b> | <b>PM<sub>2.5</sub> in Outperform scenario</b> |
|---------------|---------------|-----------------------------------------|--------------------------------------------|-------------------------------------------------------|------------------------------------------------|
| Yiyang        | Other         | 43                                      | 40.6                                       | 38.7                                                  | 39.4                                           |
| Chenzhou      | Other         | 28                                      | 26.4                                       | 25.2                                                  | 25.6                                           |
| Yongzhou      | Other         | 33                                      | 31.1                                       | 29.7                                                  | 30.2                                           |
| Huaihua       | Other         | 29                                      | 27.4                                       | 26.1                                                  | 26.5                                           |
| Loudi         | Other         | 33                                      | 31.1                                       | 29.7                                                  | 30.2                                           |
| Xiangxi       | Other         | 25                                      | 23.6                                       | 22.5                                                  | 22.9                                           |
| Guangzhou     | Other         | 23                                      | 21.7                                       | 20.7                                                  | 21.1                                           |
| Shaoguan      | Other         | 24                                      | 22.6                                       | 21.6                                                  | 22                                             |
| Shenzhen      | Other         | 19                                      | 17.9                                       | 17.1                                                  | 17.4                                           |
| Zhuhai        | Other         | 19                                      | 17.9                                       | 17.1                                                  | 17.4                                           |
| Shantou       | Other         | 19                                      | 17.9                                       | 17.1                                                  | 17.4                                           |
| Foshan        | Other         | 22                                      | 20.8                                       | 19.8                                                  | 20.1                                           |
| Jiangmen      | Other         | 21                                      | 19.8                                       | 18.9                                                  | 19.2                                           |
| Zhanjiang     | Other         | 21                                      | 19.8                                       | 18.9                                                  | 19.2                                           |
| Maoming       | Other         | 21                                      | 19.8                                       | 18.9                                                  | 19.2                                           |
| Zhaoqing      | Other         | 23                                      | 21.7                                       | 20.7                                                  | 21.1                                           |
| Huizhou       | Other         | 20                                      | 18.9                                       | 18                                                    | 18.3                                           |
| Meizhou       | Other         | 22                                      | 20.8                                       | 19.8                                                  | 20.1                                           |
| Shanwei       | Other         | 18                                      | 17                                         | 16.2                                                  | 16.5                                           |
| Heyuan        | Other         | 22                                      | 20.8                                       | 19.8                                                  | 20.1                                           |
| Yangjiang     | Other         | 21                                      | 19.8                                       | 18.9                                                  | 19.2                                           |
| Qingyuan      | Other         | 28                                      | 26.4                                       | 25.2                                                  | 25.6                                           |
| Dongguan      | Other         | 24                                      | 22.6                                       | 21.6                                                  | 22                                             |
| Zhongshan     | Other         | 20                                      | 18.9                                       | 18                                                    | 18.3                                           |
| Chaozhou      | Other         | 24                                      | 22.6                                       | 21.6                                                  | 22                                             |
| Jieyang       | Other         | 28                                      | 26.4                                       | 25.2                                                  | 25.6                                           |
| Yunfu         | Other         | 22                                      | 20.8                                       | 19.8                                                  | 20.1                                           |
| Nanning       | Other         | 26                                      | 24.5                                       | 23.4                                                  | 23.8                                           |
| Liuzhou       | Other         | 29                                      | 27.4                                       | 26.1                                                  | 26.5                                           |
| Guilin        | Other         | 29                                      | 27.4                                       | 26.1                                                  | 26.5                                           |
| Wuzhou        | Other         | 26                                      | 24.5                                       | 23.4                                                  | 23.8                                           |
| Beihai        | Other         | 23                                      | 21.7                                       | 20.7                                                  | 21.1                                           |
| Fangchenggang | Other         | 22                                      | 20.8                                       | 19.8                                                  | 20.1                                           |
| Qinzhou       | Other         | 24                                      | 22.6                                       | 21.6                                                  | 22                                             |
| Guigang       | Other         | 29                                      | 27.4                                       | 26.1                                                  | 26.5                                           |
| Yulin         | Other         | 28                                      | 26.4                                       | 25.2                                                  | 25.6                                           |
| Baise         | Other         | 27                                      | 25.5                                       | 24.3                                                  | 24.7                                           |
| Hezhou        | Other         | 27                                      | 25.5                                       | 24.3                                                  | 24.7                                           |



| <b>City</b> | <b>Region</b> | <b>PM<sub>2.5</sub> in 2020 (Base)*</b> | <b>PM<sub>2.5</sub> in Policy scenario</b> | <b>PM<sub>2.5</sub> in Average Reduction scenario</b> | <b>PM<sub>2.5</sub> in Outperform scenario</b> |
|-------------|---------------|-----------------------------------------|--------------------------------------------|-------------------------------------------------------|------------------------------------------------|
| Hechi       | Other         | 25                                      | 23.6                                       | 22.5                                                  | 22.9                                           |
| Laibin      | Other         | 30                                      | 28.3                                       | 27                                                    | 27.5                                           |
| Chongzuo    | Other         | 26                                      | 24.5                                       | 23.4                                                  | 23.8                                           |
| Haikou      | Other         | 14                                      | 13.2                                       | 12.6                                                  | 12.8                                           |
| Sanya       | Other         | 11                                      | 10.4                                       | 9.9                                                   | 10.1                                           |
| Chongqing   | Other         | 33                                      | 31.1                                       | 29.7                                                  | 30.2                                           |
| Chengdu     | Other         | 41                                      | 38.7                                       | 36.9                                                  | 37.5                                           |
| Zigong      | Other         | 43                                      | 40.6                                       | 38.7                                                  | 39.4                                           |
| Panzhuhua   | Other         | 29                                      | 27.4                                       | 26.1                                                  | 26.5                                           |
| Luzhou      | Other         | 38                                      | 35.9                                       | 34.2                                                  | 34.8                                           |
| Deyang      | Other         | 37                                      | 34.9                                       | 33.3                                                  | 33.9                                           |
| Mianyang    | Other         | 34                                      | 32.1                                       | 30.6                                                  | 31.1                                           |
| Guangyuan   | Other         | 25                                      | 23.6                                       | 22.5                                                  | 22.9                                           |
| Suining     | Other         | 29                                      | 27.4                                       | 26.1                                                  | 26.5                                           |
| Neijiang    | Other         | 34                                      | 32.1                                       | 30.6                                                  | 31.1                                           |
| Leshan      | Other         | 35                                      | 33                                         | 31.5                                                  | 32                                             |
| Nanchong    | Other         | 37                                      | 34.9                                       | 33.3                                                  | 33.9                                           |
| Meishan     | Other         | 32                                      | 30.2                                       | 28.8                                                  | 29.3                                           |
| Yibin       | Other         | 40                                      | 37.7                                       | 36                                                    | 36.6                                           |
| Guangan     | Other         | 32                                      | 30.2                                       | 28.8                                                  | 29.3                                           |
| Dazhou      | Other         | 39                                      | 36.8                                       | 35.1                                                  | 35.7                                           |
| Yaan        | Other         | 27                                      | 25.5                                       | 24.3                                                  | 24.7                                           |
| Bazhong     | Other         | 28                                      | 26.4                                       | 25.2                                                  | 25.6                                           |
| Ziyang      | Other         | 30                                      | 28.3                                       | 27                                                    | 27.5                                           |
| Aba         | Other         | 16                                      | 15.1                                       | 14.4                                                  | 14.6                                           |
| Ganzi       | Other         | 9                                       | 8.5                                        | 8.1                                                   | 8.2                                            |
| Liangshan   | Other         | 22                                      | 20.8                                       | 19.8                                                  | 20.1                                           |
| Guiyang     | Other         | 23                                      | 21.7                                       | 20.7                                                  | 21.1                                           |
| Liupanshui  | Other         | 22                                      | 20.8                                       | 19.8                                                  | 20.1                                           |
| Zunyi       | Other         | 18                                      | 17                                         | 16.2                                                  | 16.5                                           |
| Anshun      | Other         | 23                                      | 21.7                                       | 20.7                                                  | 21.1                                           |
| Bijie       | Other         | 24                                      | 22.6                                       | 21.6                                                  | 22                                             |
| Tongren     | Other         | 25                                      | 23.6                                       | 22.5                                                  | 22.9                                           |
| Qianxinan   | Other         | 19                                      | 17.9                                       | 17.1                                                  | 17.4                                           |
| Qiandongnan | Other         | 24                                      | 22.6                                       | 21.6                                                  | 22                                             |
| Qiannan     | Other         | 17                                      | 16                                         | 15.3                                                  | 15.6                                           |
| Kunming     | Other         | 24                                      | 22.6                                       | 21.6                                                  | 22                                             |
| Qujing      | Other         | 20                                      | 18.9                                       | 18                                                    | 18.3                                           |

| <b>City</b>   | <b>Region</b> | <b>PM<sub>2.5</sub> in 2020 (Base)*</b> | <b>PM<sub>2.5</sub> in Policy scenario</b> | <b>PM<sub>2.5</sub> in Average Reduction scenario</b> | <b>PM<sub>2.5</sub> in Outperform scenario</b> |
|---------------|---------------|-----------------------------------------|--------------------------------------------|-------------------------------------------------------|------------------------------------------------|
| Yuxi          | Other         | 20                                      | 18.9                                       | 18                                                    | 18.3                                           |
| Baoshan       | Other         | 19                                      | 17.9                                       | 17.1                                                  | 17.4                                           |
| Zhaotong      | Other         | 20                                      | 18.9                                       | 18                                                    | 18.3                                           |
| Lijiang       | Other         | 12                                      | 11.3                                       | 10.8                                                  | 11                                             |
| Puer          | Other         | 22                                      | 20.8                                       | 19.8                                                  | 20.1                                           |
| Lincang       | Other         | 26                                      | 24.5                                       | 23.4                                                  | 23.8                                           |
| Chuxiong      | Other         | 18                                      | 17                                         | 16.2                                                  | 16.5                                           |
| Honghe        | Other         | 26                                      | 24.5                                       | 23.4                                                  | 23.8                                           |
| Wenshan       | Other         | 23                                      | 21.7                                       | 20.7                                                  | 21.1                                           |
| Xishuangbanna | Other         | 29                                      | 27.4                                       | 26.1                                                  | 26.5                                           |
| Dali          | Other         | 16                                      | 15.1                                       | 14.4                                                  | 14.6                                           |
| Dehong        | Other         | 22                                      | 20.8                                       | 19.8                                                  | 20.1                                           |
| Nujiang       | Other         | 22                                      | 20.8                                       | 19.8                                                  | 20.1                                           |
| Diqing        | Other         | 13                                      | 12.3                                       | 11.7                                                  | 11.9                                           |
| Lhasa         | Other         | 12                                      | 11.3                                       | 10.8                                                  | 11                                             |
| Xigazê        | Other         | 9                                       | 8.5                                        | 8.1                                                   | 8.2                                            |
| Qamdo         | Other         | 10                                      | 9.4                                        | 9                                                     | 9.2                                            |
| Nyingchi      | Other         | 7                                       | 6.6                                        | 6.3                                                   | 6.4                                            |
| Shannan       | Other         | 9                                       | 8.5                                        | 8.1                                                   | 8.2                                            |
| Nagqu         | Other         | 18                                      | 17                                         | 16.2                                                  | 16.5                                           |
| Ngari         | Other         | 7                                       | 6.6                                        | 6.3                                                   | 6.4                                            |
| Xian          | FWP           | 51                                      | 43.4                                       | 45.9                                                  | 39.5                                           |
| Tongchuan     | FWP           | 43                                      | 36.6                                       | 38.7                                                  | 33.3                                           |
| Baoji         | FWP           | 47                                      | 40                                         | 42.3                                                  | 36.4                                           |
| Xianyang      | FWP           | 54                                      | 45.9                                       | 48.6                                                  | 41.9                                           |
| Weinan        | FWP           | 53                                      | 45.1                                       | 47.7                                                  | 41.1                                           |
| Yanan         | Other         | 32                                      | 30.2                                       | 28.8                                                  | 29.3                                           |
| Hanzhong      | Other         | 40                                      | 37.7                                       | 36                                                    | 36.6                                           |
| Yulin         | Other         | 33                                      | 31.1                                       | 29.7                                                  | 30.2                                           |
| Ankang        | Other         | 32                                      | 30.2                                       | 28.8                                                  | 29.3                                           |
| Shangluo      | Other         | 30                                      | 28.3                                       | 27                                                    | 27.5                                           |
| Lanzhou       | Other         | 34                                      | 32.1                                       | 30.6                                                  | 31.1                                           |
| Jiayuguan     | Other         | 22                                      | 20.8                                       | 19.8                                                  | 20.1                                           |
| Jinchang      | Other         | 20                                      | 18.9                                       | 18                                                    | 18.3                                           |
| Baiyin        | Other         | 27                                      | 25.5                                       | 24.3                                                  | 24.7                                           |
| Tianshui      | Other         | 27                                      | 25.5                                       | 24.3                                                  | 24.7                                           |
| Wuwei         | Other         | 35                                      | 33                                         | 31.5                                                  | 32                                             |
| Zhangye       | Other         | 31                                      | 29.2                                       | 27.9                                                  | 28.4                                           |

| <b>City</b> | <b>Region</b> | <b>PM<sub>2.5</sub> in 2020 (Base)*</b> | <b>PM<sub>2.5</sub> in Policy scenario</b> | <b>PM<sub>2.5</sub> in Average Reduction scenario</b> | <b>PM<sub>2.5</sub> in Outperform scenario</b> |
|-------------|---------------|-----------------------------------------|--------------------------------------------|-------------------------------------------------------|------------------------------------------------|
| Pingliang   | Other         | 22                                      | 20.8                                       | 19.8                                                  | 20.1                                           |
| Jiuquan     | Other         | 24                                      | 22.6                                       | 21.6                                                  | 22                                             |
| Qingyang    | Other         | 28                                      | 26.4                                       | 25.2                                                  | 25.6                                           |
| Dingxi      | Other         | 25                                      | 23.6                                       | 22.5                                                  | 22.9                                           |
| Longnan     | Other         | 18                                      | 17                                         | 16.2                                                  | 16.5                                           |
| Linxia      | Other         | 28                                      | 26.4                                       | 25.2                                                  | 25.6                                           |
| Gannan      | Other         | 19                                      | 17.9                                       | 17.1                                                  | 17.4                                           |
| Xining      | Other         | 35                                      | 33                                         | 31.5                                                  | 32                                             |
| Haidong     | Other         | 38                                      | 35.9                                       | 34.2                                                  | 34.8                                           |
| Haibei      | Other         | 19                                      | 17.9                                       | 17.1                                                  | 17.4                                           |
| Huangnan    | Other         | 21                                      | 19.8                                       | 18.9                                                  | 19.2                                           |
| Hainan      | Other         | 19                                      | 17.9                                       | 17.1                                                  | 17.4                                           |
| Golog       | Other         | 16                                      | 15.1                                       | 14.4                                                  | 14.6                                           |
| Yushu       | Other         | 8                                       | 7.5                                        | 7.2                                                   | 7.3                                            |
| Haixi       | Other         | 12                                      | 11.3                                       | 10.8                                                  | 11                                             |
| Yinchuan    | Other         | 36                                      | 34                                         | 32.4                                                  | 33                                             |
| Shizuishan  | Other         | 40                                      | 37.7                                       | 36                                                    | 36.6                                           |
| Wuzhong     | Other         | 34                                      | 32.1                                       | 30.6                                                  | 31.1                                           |
| Guyuan      | Other         | 24                                      | 22.6                                       | 21.6                                                  | 22                                             |
| Zhongwei    | Other         | 33                                      | 31.1                                       | 29.7                                                  | 30.2                                           |
| Urumqi      | Other         | 47                                      | 44.3                                       | 42.3                                                  | 43                                             |
| Karamay     | Other         | 26                                      | 24.5                                       | 23.4                                                  | 23.8                                           |
| Turpan      | Other         | 42                                      | 39.6                                       | 37.8                                                  | 38.4                                           |
| Hami        | Other         | 27                                      | 25.5                                       | 24.3                                                  | 24.7                                           |
| Changji     | Other         | 53                                      | 50                                         | 47.7                                                  | 48.5                                           |
| Bortala     | Other         | 24                                      | 22.6                                       | 21.6                                                  | 22                                             |
| Bayingol    | Other         | 31                                      | 29.2                                       | 27.9                                                  | 28.4                                           |
| Aksu        | Other         | 39                                      | 36.8                                       | 35.1                                                  | 35.7                                           |
| Kizilsu     | Other         | 35                                      | 33                                         | 31.5                                                  | 32                                             |
| Kashgar     | Other         | 54                                      | 51                                         | 48.6                                                  | 49.4                                           |
| Hotan       | Other         | 58                                      | 54.7                                       | 52.2                                                  | 53.1                                           |
| Ili         | Other         | 43                                      | 40.6                                       | 38.7                                                  | 39.4                                           |
| Tacheng     | Other         | 12                                      | 11.3                                       | 10.8                                                  | 11                                             |
| Altay       | Other         | 10                                      | 9.4                                        | 9                                                     | 9.2                                            |
| Shihezi     | Other         | 56                                      | 52.8                                       | 50.4                                                  | 51.3                                           |
| Wujiaqu     | Other         | 63                                      | 59.4                                       | 56.7                                                  | 57.7                                           |

\*Historical annual mean PM<sub>2.5</sub> concentrations for each city published by the Chinese government are rounded to integers.

**Supplementary Materials Table S2| Gains in national average life expectancy from 2020 to 2025 in different scenarios estimated based on demographic information and baseline mortality incidence rate in different years (unit: day).**

|                                          | <i>Policy</i> | <i>Average Reduction</i> | <i>Outperform</i> |
|------------------------------------------|---------------|--------------------------|-------------------|
| Demographic information and BMR* in 2014 | 42.1          | 38.1                     | 64.8              |
| Demographic information and BMR in 2015  | 42.2          | 38.2                     | 64.9              |
| Demographic information and BMR in 2016  | 42.2          | 38.2                     | 64.9              |
| Demographic information and BMR in 2017  | 42.4          | 38.3                     | 65.1              |
| Demographic information and BMR in 2018  | 42.5          | 38.4                     | 65.3              |
| Demographic information and BMR in 2019  | 42.5          | 38.4                     | 65.4              |

\*BMR refers to baseline mortality incidence rate.
